# Supplementary material
Source: Springer Nature journal article supplement (https://www.springermedizin.de/resource/supplementary/13221_2013_93_MOESM3_ESM.pdf/9680910)

*cyclo*[DKP-RGD] 1 (M)

0

$1 \times 10^{-9}$

$1 \times 10^{-6}$

basal conditions

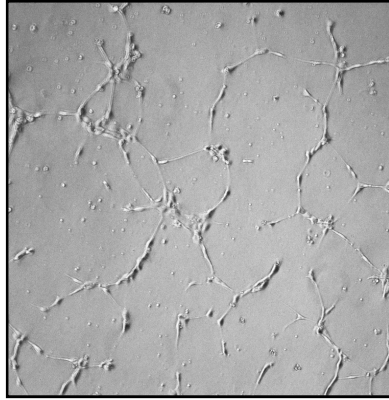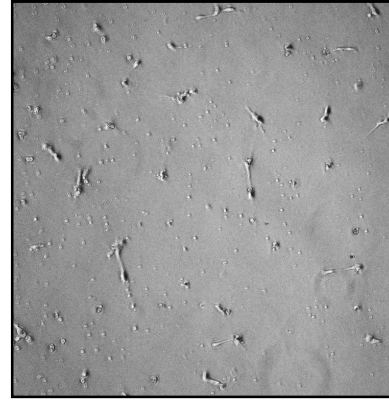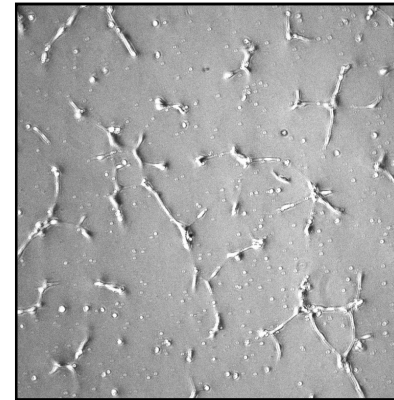

VEGF, EGF, IGF-I, FGF2

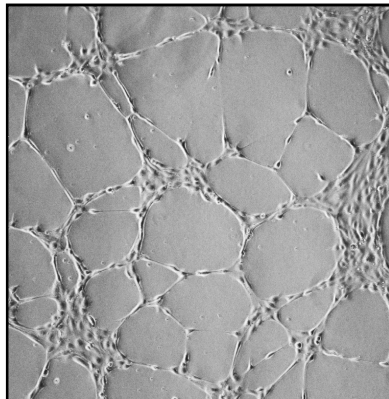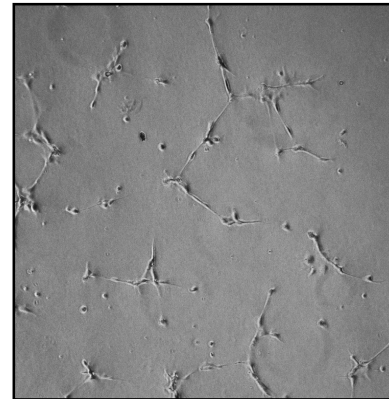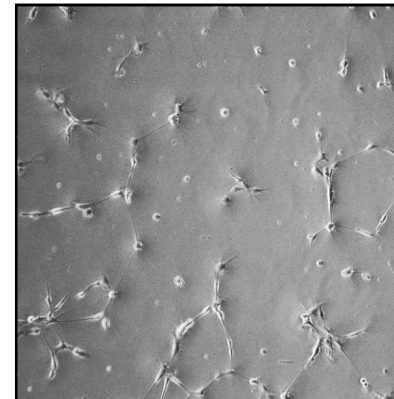

IL-8

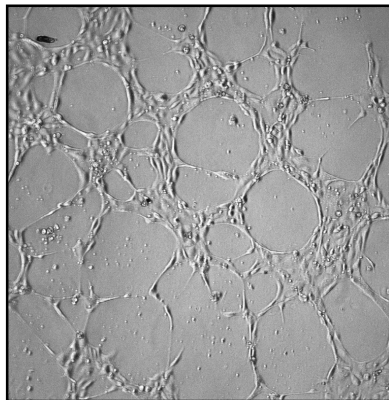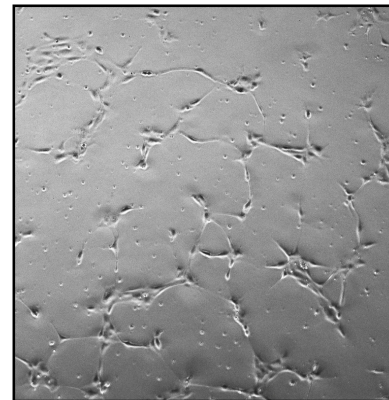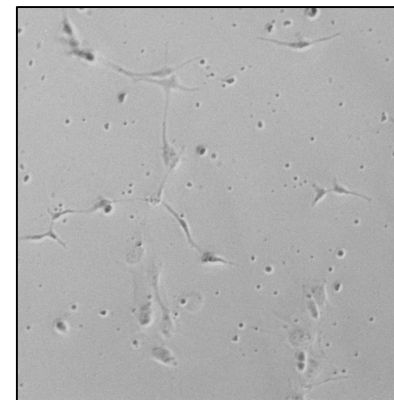

Supplement: MOESM3 [file 9680910]
